# Supplementary material for: Current Perspectives on the Determinants of Acceptability of Pre-Exposure Prophylaxis and Nonoccupational Post-Exposure Prophylaxis among People at Risk for HIV: A Scoping Review
Source: MDPI journal article supplement (doi:10.3390/ijerph191912605), 2022-10-02
Supplement: s1 [file s1]

| Database | Literature Search Strategy                                                                                                                                                                                                                                                                                                                                                                                                                                                                                                                                                                                                                                                                                                                                                                                                                                                                                                                                                                                                                                                                                                                                                                                                                                                                                                                                                                                                                                                                                                                                                                                                                                                                                                                                                                                                                                                                                                                                                                                                                                                                                                                                                                                                                                                                                                                                                                                                                                                                                                                                                                                                                                                  |
|----------|-----------------------------------------------------------------------------------------------------------------------------------------------------------------------------------------------------------------------------------------------------------------------------------------------------------------------------------------------------------------------------------------------------------------------------------------------------------------------------------------------------------------------------------------------------------------------------------------------------------------------------------------------------------------------------------------------------------------------------------------------------------------------------------------------------------------------------------------------------------------------------------------------------------------------------------------------------------------------------------------------------------------------------------------------------------------------------------------------------------------------------------------------------------------------------------------------------------------------------------------------------------------------------------------------------------------------------------------------------------------------------------------------------------------------------------------------------------------------------------------------------------------------------------------------------------------------------------------------------------------------------------------------------------------------------------------------------------------------------------------------------------------------------------------------------------------------------------------------------------------------------------------------------------------------------------------------------------------------------------------------------------------------------------------------------------------------------------------------------------------------------------------------------------------------------------------------------------------------------------------------------------------------------------------------------------------------------------------------------------------------------------------------------------------------------------------------------------------------------------------------------------------------------------------------------------------------------------------------------------------------------------------------------------------------------|
| Scopus   | <p>( TITLE-ABS-KEY ( prep ) OR TITLE-ABS-KEY ( pre-exposure AND prophylaxis ) OR TITLE-ABS-KEY ( iprex ) OR TITLE-ABS-KEY ( prep AND chemo-prophylaxis ) OR TITLE-ABS-KEY ( chemo-prophylaxis ) OR TITLE-ABS-KEY ( chemo-prevention ) OR TITLE-ABS-KEY ( npep ) OR TITLE-ABS-KEY ( post-exposure AND prophylaxis ) OR TITLE-ABS-KEY ( non-occupational AND post AND exposure AND prophylaxis ) OR TITLE-ABS-KEY ( pep ) OR TITLE-ABS-KEY ( truvada ) OR TITLE-ABS-KEY ( tenofovir ) OR TITLE-ABS-KEY ( emtricitabine ) )</p> <p>AND</p> <p>( ALL ( hiv ) OR ALL ( human AND immunodeficiency AND virus ) OR ALL ( aids ) OR ALL ( acquired AND immunodeficiency AND syndrome ) ) AND ( TITLE-ABS-KEY ( willing* ) OR TITLE-ABS-KEY ( accep* ) OR TITLE-ABS-KEY ( prefer* ) OR TITLE-ABS-KEY ( use ) OR TITLE-ABS-KEY ( attitude ) )</p> <p>AND NOT</p> <p>( TITLE ( review ) )</p> <p>AND</p> <p>( LIMIT-TO ( PUBYEAR , 2022 ) OR LIMIT-TO ( PUBYEAR , 2021 ) OR LIMIT-TO ( PUBYEAR , 2020 ) )</p>                                                                                                                                                                                                                                                                                                                                                                                                                                                                                                                                                                                                                                                                                                                                                                                                                                                                                                                                                                                                                                                                                                                                                                                                                                                                                                                                                                                                                                                                                                                                                                                                                                                                          |
| Pubmed   | <p>((("PrEP"[Title/Abstract] OR "pre exposure prophylaxis"[Title/Abstract] OR "nPEP"[Title/Abstract] OR "post exposure prophylaxis"[Title/Abstract] OR "non occupational post exposure prophylaxis"[Title/Abstract] OR "PEP"[Title/Abstract]) AND 2018/01/01:3000/12/31[Date - Publication])</p> <p>AND</p> <p>("willing*"[Title/Abstract] OR "accep*"[Title/Abstract] OR "prefer*"[Title/Abstract] OR "attitude"[Title/Abstract] OR "use"[Title/Abstract])</p> <p>AND</p> <p>("hiv"[MeSH Terms] OR "hiv"[All Fields] OR ("hiv"[MeSH Terms] OR "hiv"[All Fields] OR ("human"[All Fields] AND "immunodeficiency"[All Fields] AND "virus"[All Fields]) OR "human immunodeficiency virus"[All Fields]) OR ("acquired immunodeficiency syndrome"[MeSH Terms] OR ("acquired"[All Fields] AND "immunodeficiency"[All Fields] AND "syndrome"[All Fields]) OR "acquired immunodeficiency syndrome"[All Fields] OR "aids"[All Fields]) OR ("acquired immunodeficiency syndrome"[MeSH Terms] OR ("acquired"[All Fields] AND "immunodeficiency"[All Fields] AND "syndrome"[All Fields]) OR "acquired immunodeficiency syndrome"[All Fields])) NOT "review"[Title])</p> <p>AND</p> <p>((("female"[MeSH Terms] OR "female"[All Fields] OR ("female"[All Fields] AND "sex"[All Fields]) OR "female sex"[All Fields]) AND ("occupational groups"[MeSH Terms] OR ("occupational"[All Fields] AND "groups"[All Fields]) OR "occupational groups"[All Fields] OR "worker"[All Fields] OR "workers"[All Fields] OR "worker s"[All Fields])) OR "FSW"[All Fields] OR "csw"[All Fields] OR (("people s"[All Fields] OR "peopled"[All Fields] OR "peopling"[All Fields] OR "persons"[MeSH Terms] OR "persons"[All Fields] OR "people"[All Fields] OR "peoples"[All Fields]) AND "who"[All Fields] AND ("inject"[All Fields] OR "injectability"[All Fields] OR "injectant"[All Fields] OR "injectants"[All Fields] OR "injectate"[All Fields] OR "injectates"[All Fields] OR "injected"[All Fields] OR "injectible"[All Fields] OR "injectibles"[All Fields] OR "injecting"[All Fields] OR "injections"[MeSH Terms] OR "injections"[All Fields] OR "injectable"[All Fields] OR "injectables"[All Fields] OR "injection"[All Fields] OR "injects"[All Fields]) AND "drug"[All Fields]) OR (("inject"[All Fields] OR "injectability"[All Fields] OR "injectant"[All Fields] OR "injectants"[All Fields] OR "injectate"[All Fields] OR "injectates"[All Fields] OR "injected"[All Fields] OR "injectible"[All Fields] OR "injectibles"[All Fields] OR "injecting"[All Fields] OR "injections"[MeSH Terms] OR "injections"[All Fields] OR "injectable"[All Fields] OR "injectables"[All Fields] OR</p> |

|  |                                                                                                                                                                                                                                                                                                                                                                                                                                                                                                                                                                                                                                                                                                                                                                                                                                                                                                                                                                                       |
|--|---------------------------------------------------------------------------------------------------------------------------------------------------------------------------------------------------------------------------------------------------------------------------------------------------------------------------------------------------------------------------------------------------------------------------------------------------------------------------------------------------------------------------------------------------------------------------------------------------------------------------------------------------------------------------------------------------------------------------------------------------------------------------------------------------------------------------------------------------------------------------------------------------------------------------------------------------------------------------------------|
|  | " injection"[All Fields] OR " injects"[All Fields]) AND (" drug users"[MeSH Terms] OR (" drug"[All Fields] AND " users"[All Fields]) OR " drug users"[All Fields] OR (" drug"[All Fields] AND " user"[All Fields]) OR " drug user"[All Fields])) OR " PWID"[All Fields] OR " IDU"[All Fields] OR (" sexual and gender minorities"[MeSH Terms] OR (" sexual"[All Fields] AND " gender"[All Fields] AND " minorities"[All Fields]) OR " sexual and gender minorities"[All Fields] OR (" men"[All Fields] AND " who"[All Fields] AND " sex"[All Fields] AND " men"[All Fields]) OR " men who have sex with men"[All Fields]) OR (" mens sana monogr"[Journal] OR " mater sociomed"[Journal] OR " msm"[All Fields]) OR (" sex workers"[MeSH Terms] OR (" sex"[All Fields] AND " workers"[All Fields]) OR " sex workers"[All Fields] OR (" sex"[All Fields] AND " worker"[All Fields]) OR " sex worker"[All Fields])) AND 2019/01/01:3000/12/31[Date - Publication]) AND (2020:2022[pdat]) |
|--|---------------------------------------------------------------------------------------------------------------------------------------------------------------------------------------------------------------------------------------------------------------------------------------------------------------------------------------------------------------------------------------------------------------------------------------------------------------------------------------------------------------------------------------------------------------------------------------------------------------------------------------------------------------------------------------------------------------------------------------------------------------------------------------------------------------------------------------------------------------------------------------------------------------------------------------------------------------------------------------|
